# Supplementary material
Source: MDPI journal article supplement (https://www.mdpi.com/2076-3417/13/1/310)
Supplement: s1 [file s1 › applsci-2052497-supplementary.pdf]

1. Selection of materials – the criteria taken into consideration by the company when selecting materials ( $\geq 0$ );
2. Compatibility of materials for recycling – taking into consideration the compatibility of materials at the product development stage (yes/no);
3. Use of recyclates – use of recycled materials (yes/no);
4. Types of joints – taking into consideration the types of joints used between components, with a view of future recycling (yes/no);
5. Easy disassembly of products – product development with a view of quick and easy disassembly (yes/no);
6. Consideration of energy efficiency at design stage – taking into consideration the product's energy efficiency at the development stage (yes/no);
7. Preliminary studies – the performance of preliminary analyses at the stage of product design ( $\geq 0$ );
8. Analyses during design stage – analyses of products at the development stage in terms of their environmental performance ( $\geq 0$ );
9. Systems supporting assessment of design solutions – having systems supporting the assessment of design solutions in place (yes/no);
10. Types of systems supporting assessment of design solutions used ( $\geq 0$ );
11. Systems supporting assessment of eco-friendliness of designed products – having systems supporting the assessment of environmental performance in place (yes/no);
12. Types of methods or systems supporting assessment of eco-friendliness of designed products ( $\geq 0$ );
13. Waste management policy – waste treatment or recycling (yes/no);
14. Waste segregation – (yes/no);
15. Eco-labelling – application of eco-labelling (yes/no);
16. Types of eco-labelling – types of eco-labelling in use ( $\geq 0$ );
17. Legal standards – the legal standards complied with at the company ( $\geq 0$ );
18. Energy efficiency packages – following the guidelines for critical values of emissions, rules of conduct aimed at savings and safety requirements ( $\geq 0$ );
19. Negative impact of products on environment – the type of negative impact of the product on the environment ( $\leq 0$ );
20. Arguments for ecodesign – arguments promoting ecodesign, relevant to the company's operational activity ( $\geq 0$ );
21. How competitiveness is achieved – ways to gain a competitive edge ( $\geq 0$ );
22. "Green company" aspirations – building the image of an environmentally friendly company (yes/no);
23. Motivation to become a "green company" – aspects motivating the gaining of a "green company" title ( $\geq 0$ );
24. What happens to products at end of life cycle – handling products after the end of their lifetime ( $\geq 0$ );
25. Products withdrawn from market – handling products withdrawn from the market ( $\geq 0$ );
26. Segregation of used products – ways of segregation of used products ( $\geq 0$ );
27. Disassembly of used products – ways of disassembly of used products ( $\geq 0$ ).

|                                                           |                 |                 |                 |                 |                 |                 |                 |                 |                 |                  |                  |                  |                  |                  |                  |
|-----------------------------------------------------------|-----------------|-----------------|-----------------|-----------------|-----------------|-----------------|-----------------|-----------------|-----------------|------------------|------------------|------------------|------------------|------------------|------------------|
| Assessment of pro-environmental solutions applied in SMEs | Questionnaire 1 | Questionnaire 2 | Questionnaire 3 | Questionnaire 4 | Questionnaire 5 | Questionnaire 6 | Questionnaire 7 | Questionnaire 8 | Questionnaire 9 | Questionnaire 10 | Questionnaire 11 | Questionnaire 12 | Questionnaire 13 | Questionnaire 14 | Questionnaire 15 |
| Product design                                            |                 |                 |                 |                 |                 |                 |                 |                 |                 |                  |                  |                  |                  |                  |                  |

|                                                                                                                        |     |     |     |     |     |     |     |     |     |     |     |     |     |     |     |
|------------------------------------------------------------------------------------------------------------------------|-----|-----|-----|-----|-----|-----|-----|-----|-----|-----|-----|-----|-----|-----|-----|
| Selection of materials <sup>1)</sup>                                                                                   | 3   | 3   | 2   | 2   | 2   | 3   | 1   | 3   | 2   | 3   | 3   | 4   | 2   | 3   | 3   |
| Compatibility of materials <sup>2)</sup>                                                                               | yes | yes | yes | yes | yes | 0   | 0   | yes | no  | no  | yes | yes | yes | yes | yes |
| Use of recyclates <sup>3)</sup>                                                                                        | no  | yes | no  | 0   | no  | no  | no  | yes | no  | no  | yes | yes | no  | yes | yes |
| Types of joints <sup>4)</sup>                                                                                          | yes | no  | yes | yes | yes | 0   | yes | no  | no  | no  | yes | yes | no  | no  | yes |
| Easy disassembly of products <sup>5)</sup>                                                                             | yes | 0   | 0   | yes | yes | 0   | yes | no  | no  | no  | yes | no  | no  | no  | no  |
| Consideration of energy efficiency at design stage <sup>6)</sup>                                                       | no  | yes | yes | yes | no  | 0   | yes | no  | no  | no  | yes | yes | no  | no  | yes |
| Preliminary studies <sup>7)</sup>                                                                                      | 1   | 1   | 1   | 1   | 1   | 1   | 1   | 1   | 1   | 1   | 2   | 3   | 1   | 1   | 2   |
| Analyses during design stage <sup>8)</sup>                                                                             | 1   | 4   | 2   | 3   | 2   | 2   | 1   | 2   | 1   | 1   | 4   | 3   | 1   | 2   | 3   |
| Systems supporting assessment of design solutions <sup>9)</sup>                                                        | no  | yes | yes | no  | yes | no  | yes | no  | no  | no  | yes | no  | no  | yes | yes |
| Types of systems supporting assessment of design solutions in use <sup>10)</sup>                                       | 0   | 5   | 3   | 0   | 5   | 0   | 2   | 0   | 0   | 0   | 3   | 0   | 0   | 3   | 4   |
| Systems supporting assessment of ecofriendliness of designed products <sup>11)</sup>                                   | no  |
| Types of methods or systems supporting assessment of environmental ecofriendliness of designed products <sup>12)</sup> | 0   | 0   | 0   | 0   | 0   | 0   | 0   | 0   | 0   | 0   | 0   | 0   | 0   | 0   | 0   |
| Product manufacturing                                                                                                  |     |     |     |     |     |     |     |     |     |     |     |     |     |     |     |
| Waste management policy <sup>13)</sup>                                                                                 | yes | yes | yes | yes | yes | no  | yes | no  | yes |
| Waste segregation <sup>14)</sup>                                                                                       | yes |
| Eco-labelling <sup>15)</sup>                                                                                           | no  | yes | no  | yes | no  | yes | no  | no  | no  | no  | yes | no  | no  | no  | no  |
| Types of eco-labelling <sup>16)</sup>                                                                                  | 0   | 1   | 0   | 2   | 0   | 1   | 0   | 0   | 0   | 0   | 1   | 0   | 0   | 0   | 0   |
| Legal standards <sup>17)</sup>                                                                                         | 2   | 2   | 1   | 2   | 2   | 1   | 1   | 1   | 1   | 1   | 1   | 2   | 1   | 2   | 3   |
| Energy efficiency packages <sup>18)</sup>                                                                              | 2   | 1   | 1   | 2   | 2   | 1   | 2   | 1   | 3   | 0   | 4   | 3   | 2   | 4   | 4   |
| Product use                                                                                                            |     |     |     |     |     |     |     |     |     |     |     |     |     |     |     |
| Negative impact of products on environment <sup>19)</sup>                                                              | 0   | -2  | -2  | -1  | -2  | -1  | -1  | -1  | 0   | -2  | -4  | -2  | -1  | -2  | -3  |
| Arguments for ecodesign <sup>20)</sup>                                                                                 | 5   | 4   | 5   | 4   | 2   | 3   | 2   | 1   | 1   | 4   | 5   | 3   | 5   | 4   | 4   |

|                                                              |     |     |     |     |    |     |    |     |    |     |     |     |    |     |     |
|--------------------------------------------------------------|-----|-----|-----|-----|----|-----|----|-----|----|-----|-----|-----|----|-----|-----|
| How competitiveness is achieved <sup>21)</sup>               | 3   | 4   | 2   | 3   | 3  | 1   | 1  | 1   | 2  | 3   | 3   | 3   | 2  | 4   | 3   |
| "Green company" aspirations <sup>22)</sup>                   | yes | yes | yes | yes | no | yes | no | yes | no | yes | yes | yes | no | yes | yes |
| Motivation to become a "green company" <sup>23)</sup>        | 1   | 2   | 2   | 2   | 0  | 1   | 0  | 1   | 0  | 2   | 1   | 2   | 0  | 1   | 2   |
| Product recycling                                            |     |     |     |     |    |     |    |     |    |     |     |     |    |     |     |
| What happens to products at end of life cycle <sup>24)</sup> | 0   | 1   | 1   | 1   | 1  | 1   | 1  | 1   | 0  | 1   | 1   | 1   | 1  | 1   | 1   |
| Products withdrawn from market <sup>25)</sup>                | 1   | 2   | 1   | 1   | 1  | 1   | 1  | 1   | 0  | 1   | 1   | 4   | 1  | 2   | 2   |
| Segregation of used products <sup>26)</sup>                  | 2   | 2   | 1   | 0   | 1  | 1   | 1  | 1   | 0  | 0   | 1   | 1   | 1  | 1   | 1   |
| Disassembly of used products <sup>27)</sup>                  | 0   | 0   | 1   | 0   | 1  | 0   | 1  | 1   | no | 1   | 1   | 1   | 1  | 1   | 1   |

**Table S2.** Assessment of pro-environmental solutions implemented in large-sized enterprises (LEs).

| Assessment of pro-environmental solutions applied in les                         | Questionnaire 1 | Questionnaire 2 | Questionnaire 3 | Questionnaire 4 | Questionnaire 5 | Questionnaire 6 | Questionnaire 7 | Questionnaire 8 | Questionnaire 9 | Questionnaire 10 | Questionnaire 11 | Questionnaire 12 | Questionnaire 13 | Questionnaire 14 | Questionnaire 15 |
|----------------------------------------------------------------------------------|-----------------|-----------------|-----------------|-----------------|-----------------|-----------------|-----------------|-----------------|-----------------|------------------|------------------|------------------|------------------|------------------|------------------|
| Product design                                                                   |                 |                 |                 |                 |                 |                 |                 |                 |                 |                  |                  |                  |                  |                  |                  |
| Selection of materials <sup>1)</sup>                                             | 2               | 4               | 3               | 4               | 3               | 3               | 3               | 2               | 3               | 4                | 3                | 3                | 2                | 3                | 3                |
| Compatibility of materials <sup>2)</sup>                                         | no              | no              | yes              | yes              | yes              | yes              | yes              | yes              |
| Use of recyclates <sup>3)</sup>                                                  | no              | yes             | no              | yes             | yes             | yes             | yes             | no              | yes             | yes              | yes              | yes              | yes              | no               | yes              |
| Types of joints <sup>4)</sup>                                                    | no              | yes              | yes              | no               | no               | yes              | yes              |
| Easy disassembly of product <sup>5)</sup>                                        | no              | yes             | yes             | no              | no              | no              | yes             | no              | yes             | no               | yes              | yes              | yes              | yes              | no               |
| Consideration of energy efficiency at design stage <sup>6)</sup>                 | no              | yes              | yes              | yes              | yes              | yes              | yes              |
| Preliminary studies <sup>7)</sup>                                                | 1               | 3               | 1               | 2               | 1               | 3               | 1               | 2               | 2               | 1                | 3                | 1                | 2                | 1                | 2                |
| Analyses during design stage <sup>8)</sup>                                       | 1               | 5               | 2               | 2               | 5               | 5               | 5               | 2               | 1               | 4                | 5                | 2                | 6                | 3                | 4                |
| Systems supporting assessment of design solutions <sup>9)</sup>                  | no              | yes             | no               | yes              | yes              | yes              | yes              | no               |
| Types of systems supporting assessment of design solutions in use <sup>10)</sup> | 0               | 1               | 2               | 6               | 2               | 3               | 3               | 2               | 5               | 0                | 2                | 2                | 3                | 5                | 0                |
| Systems supporting                                                               | no              | yes             | no              | no              | no              | no              | yes             | no              | yes             | no               | yes              | no               | no               | no               | no               |

|                                                                                                            |     |     |     |     |     |     |     |     |     |     |     |     |     |     |     |
|------------------------------------------------------------------------------------------------------------|-----|-----|-----|-----|-----|-----|-----|-----|-----|-----|-----|-----|-----|-----|-----|
| assessment of econofriendliness of designed products <sup>11)</sup>                                        |     |     |     |     |     |     |     |     |     |     |     |     |     |     |     |
| Types of methods or systems supporting assessment of econofriendliness of designed products <sup>12)</sup> | 0   | 1   | 0   | 0   | 0   | 0   | 1   | 0   | 2   | 0   | 2   | 0   | 0   | 0   | 0   |
| Product manufacturing                                                                                      |     |     |     |     |     |     |     |     |     |     |     |     |     |     |     |
| Waste policy <sup>13)</sup>                                                                                | yes | no  | yes |
| Waste segregation <sup>14)</sup>                                                                           | yes |
| Econolabelling <sup>15)</sup>                                                                              | yes | yes | no  | no  | no  | no  | yes |
| Types of eco-labelling <sup>16)</sup>                                                                      | 1   | 1   | 0   | 0   | 0   | 0   | 1   | 0   | 2   | 0   | 1   | 0   | 1   | 0   | 1   |
| Legal standards <sup>17)</sup>                                                                             | 1   | 4   | 0   | 1   | 1   | 1   | 3   | 1   | 4   | 2   | 1   | 1   | 2   | 6   | 1   |
| Energy efficiency packages <sup>18)</sup>                                                                  | 1   | 5   | 1   | 3   | 2   | 3   | 3   | 3   | 5   | 4   | 2   | 3   | 0   | 2   | 4   |
| Product use                                                                                                |     |     |     |     |     |     |     |     |     |     |     |     |     |     |     |
| Negative impact of products on environment <sup>19)</sup>                                                  | -2  | -3  | -4  | -1  | 0   | -3  | -3  | -3  | -5  | -4  | -3  | -3  | -3  | -2  | -2  |
| Arguments for ecodesign <sup>20)</sup>                                                                     | 2   | 4   | 7   | 4   | 5   | 2   | 3   | 4   | 8   | 4   | 3   | 3   | 3   | 4   | 1   |
| How competitiveness is achieved <sup>21)</sup>                                                             | 1   | 3   | 4   | 3   | 3   | 3   | 2   | 2   | 4   | 4   | 3   | 1   | 3   | 3   | 1   |
| “Green company” aspirations <sup>22)</sup>                                                                 | no  | yes | yes | yes | yes | no  | yes | no  |
| Motivation to become a “green company” <sup>23)</sup>                                                      | 0   | 2   | 1   | 1   | 1   | 0   | 2   | 2   | 2   | 1   | 2   | 3   | 1   | 2   | 0   |
| Product recycling                                                                                          |     |     |     |     |     |     |     |     |     |     |     |     |     |     |     |
| What happens to products at end of life cycle <sup>24)</sup>                                               | 1   | 1   | 0   | 1   | 0   | 1   | 1   | 1   | 1   | 1   | 1   | 1   | 1   | 1   | 1   |
| Products withdrawn from market <sup>25)</sup>                                                              | 4   | 2   | 1   | 2   | 1   | 0   | 1   | 0   | 2   | 1   | 1   | 1   | 1   | 0   | 1   |
| Segregation of used products <sup>26)</sup>                                                                | 1   | 4   | 1   | 1   | 0   | 2   | 2   | 0   | 3   | 1   | 0   | 1   | 1   | 1   | 1   |
| Disassembly of used products <sup>27)</sup>                                                                | 1   | 2   | 1   | 1   | 1   | 1   | 4   | 0   | 3   | 1   | 1   | 2   | 1   | 1   | 1   |
